# Supplementary material for: Anthrax Toxins Inhibit Neutrophil Signaling Pathways in Brain Endothelium and Contribute to the Pathogenesis of Meningitis
Source: PLoS One. 2008 Aug 13;3(8):e2964. doi: 10.1371/journal.pone.0002964 (PMC2493037; doi:10.1371/journal.pone.0002964)
Supplement: Table S1 — A. Genes affected in hBMEC >2 fold by infection with B. anthracis Sterne B. Genes affected in hBMEC >2 fold by infection with pXO1 deficient mutant (0.07 MB XLS) [file pone.0002964.s001.xls]

## Sheet: Blad1
Table S1
A. Genes affected in hBMEC > 2 fold by infection with B. anthracis Sterne
Downregulated genes
Gene Accession number	Description	Fold change
BQ438671	AGENCOURT_7908292 NIH_MGC_82 cDNA clone IMAGE:6102595 5	-10.6627
BU536065	AGENCOURT_10229596 NIH_MGC_141 cDNA clone IMAGE:6563923 5	-10.4083
NM_020119.3	zinc finger CCCH-type, antiviral 1 (ZC3HAV1), transcript variant 1	-6.77631
NM_001554.3	cysteine-rich, angiogenic inducer, 61 (CYR61)	-6.14702
XM_938904.1	PREDICTED: BTG3 associated nuclear protein (BANP)	-4.94476
NM_016270.2	Kruppel-like factor 2 (lung) (KLF2)	-4.8053
NM_015885.2	PCF11, cleavage and polyadenylation factor subunit, homolog (S. cerevisiae) (PCF11)	-4.78898
NM_030919.1	chromosome 20 open reading frame 129 (C20orf129)	-4.76039
NM_001326.2	cleavage stimulation factor, 3 pre-RNA, subunit 3, 77kDa (CSTF3), transcript variant 1	-4.65437
NM_006831.1	ATP/GTP-binding protein (HEAB)	-4.58846
NM_003234.1	transferrin receptor (p90, CD71) (TFRC)	-4.53303
NM_001761.1	cyclin F (CCNF)	-4.47244
NM_012177.2	F-box protein 5 (FBXO5)	-4.4701
NM_005842.2	sprouty homolog 2 (Drosophila) (SPRY2)	-4.21925
NM_001964.2	early growth response 1 (EGR1)	-4.06673
NM_005329.2	hyaluronan synthase 3 (HAS3), transcript variant 1	-3.92637
NM_145014.1	hydrolethalus syndrome 1 (HYLS1)	-3.87812
NM_002167.2	inhibitor of DNA binding 3, dominant negative helix-loop-helix protein (ID3)	-3.73537
NM_003390.2	WEE1 homolog (S. pombe) (WEE1)	-3.59445
NM_024924.3	zinc finger protein 702 (ZNF702)	-3.58608
AK094914	cDNA FLJ37595 fis, clone BRCOC2007864	-3.53276
NM_182661.1	ceramide kinase (CERK), transcript variant 2	-3.52259
NR_001566.1	telomerase RNA component (TERC) on chromosome 3.	-3.43986
NM_018169.2	chromosome 12 open reading frame 35 (C12orf35)	-3.41613
NM_005904.2	SMAD, mothers against DPP homolog 7 (Drosophila) (SMAD7)	-3.31492
NM_005524.2	hairy and enhancer of split 1, (Drosophila) (HES1)	-3.28486
NM_005438.2	FOS-like antigen 1 (FOSL1)	-3.26242
NM_198088.1	zinc finger protein 200 (ZNF200), transcript variant 3	-3.22233
NM_018410.2	hypothetical protein DKFZp762E1312 (DKFZp762E1312)	-3.19941
NM_013376.1	SERTA domain containing 1 (SERTAD1)	-3.18594
NM_018348.4	hypothetical protein FLJ11171 (FLJ11171)	-3.17771
NM_021826.4	hypothetical protein FLJ13149 (FLJ13149)	-3.14481
NM_020967.2	nuclear receptor coactivator 5 (NCOA5)	-3.12646
NM_024700.2	Smad nuclear interacting protein 1 (SNIP1)	-3.07094
NM_173510.1	hypothetical protein FLJ33814 (FLJ33814)	-3.05064
NM_003192.1	tubulin-specific chaperone c (TBCC)	-3.04339
NM_024808.2	FLJ22624 protein (FLJ22624)	-3.03773
NM_016324.2	zinc finger protein 274 (ZNF274), transcript variant ZNF274b	-3.03241
NM_178558.2	zinc finger protein 680 (ZNF680)	-3.0255
NM_015483.1	kelch repeat and BTB (POZ) domain containing 2 (KBTBD2)	-3.00145
NM_017420.2	sine oculis homeobox homolog 4 (Drosophila) (SIX4)	-2.97083
NM_017669.2	FLJ20105 protein (FLJ20105), transcript variant 1	-2.96556
NM_153690.4	family with sequence similarity 43, member A (FAM43A)	-2.95185
NM_079837.1	BTG3 associated nuclear protein (BANP), transcript variant 2	-2.94286
CR622439	full-length cDNA clone CS0DF005YI08 of Fetal brain of (human)	-2.93091
NM_173475.1	DCN1, defective in cullin neddylation 1, domain containing 3 (S. cerevisiae) (DCUN1D3)	-2.91034
NM_181353.1	inhibitor of DNA binding 1, dominant negative helix-loop-helix protein (ID1), transcript variant 2	-2.90934
NM_005773.2	zinc finger protein 256 (ZNF256)	-2.90284
NM_006526.2	zinc finger protein 217 (ZNF217)	-2.90011
NM_032448.1	KIAA1838 (KIAA1838)	-2.89772
NM_003824.2	Fas (TNFRSF6)-associated via death domain (FADD)	-2.87208
NM_004926.2	zinc finger protein 36, C3H type-like 1 (ZFP36L1)	-2.85448
NM_020529.1	nuclear factor of kappa light polypeptide gene enhancer in B-cells inhibitor, alpha (NFKBIA)	-2.84466
NM_000891.2	potassium inwardly-rectifying channel, subfamily J, member 2 (KCNJ2)	-2.82912
NM_014345.1	zinc finger protein 318 (ZNF318)	-2.82194
NM_005080.2	X-box binding protein 1 (XBP1)	-2.81479
NM_024585.2	armadillo repeat containing 7 (ARMC7)	-2.80675
NM_001005290.2	proline/serine-rich coiled-coil 1 (PSRC1), transcript variant 2	-2.79348
NM_022768.4	RNA binding motif protein 15 (RBM15)	-2.7933
NM_003407.1	zinc finger protein 36, C3H type, homolog (mouse) (ZFP36)	-2.79092
NM_152735.3	zinc finger and BTB domain containing 9 (ZBTB9)	-2.77229
NM_133466.1	zinc finger protein 545 (ZNF545)	-2.76687
NM_152515.2	hypothetical protein FLJ40629 (FLJ40629)	-2.75901
NM_002714.2	protein phosphatase 1, regulatory subunit 10 (PPP1R10)	-2.7587
NM_003358.1	UDP-glucose ceramide glucosyltransferase (UGCG)	-2.73933
NM_003035.1	SCL/TAL1 interrupting locus (STIL)	-2.72065
NM_177401.4	midnolin (MIDN)	-2.71889
NM_019606.4	bin3, bicoid-interacting 3, homolog (Drosophila) (BCDIN3)	-2.71016
NM_198434.1	serine/threonine kinase 6 (STK6), transcript variant 3	-2.70361
NM_018380.2	DEAD (Asp-Glu-Ala-Asp) box polypeptide 28 (DDX28), nuclear gene encoding mitochondrial protein	-2.6882
NM_000346.2	SRY (sex determining region Y)-box 9 (campomelic dysplasia, autosomal sex-reversal) (SOX9)	-2.68584
NM_024747.4	Hermansky-Pudlak syndrome 6 (HPS6)	-2.68001
NM_013316.2	CCR4-NOT transcription complex, subunit 4 (CNOT4), transcript variant 1	-2.67563
NM_004645.2	coilin (COIL)	-2.67404
NM_002657.2	pleiomorphic adenoma gene-like 2 (PLAGL2)	-2.64391
NM_152260.1	RNA pseudouridylate synthase domain containing 2 (RPUSD2)	-2.63401
NM_005655.1	Kruppel-like factor 10 (KLF10), transcript variant 1	-2.63348
NM_005345.4	heat shock 70kDa protein 1A (HSPA1A)	-2.62813
NM_032521.1	par-6 partitioning defective 6 homolog beta (C. elegans) (PARD6B)	-2.62427
NM_030645.1	SH3-binding domain protein 5-like (SH3BP5L)	-2.61223
NM_019843.2	eukaryotic translation initiation factor 4E nuclear import factor 1 (EIF4ENIF1)	-2.60563
NM_018132.3	chromosome 6 open reading frame 139 (C6orf139)	-2.59251
NM_181869.1	apoptotic peptidase activating factor (APAF1), transcript variant 5	-2.58919
NM_025195.2	tribbles homolog 1 (Drosophila) (TRIB1)	-2.55773
NM_017822.2	chromosome 12 open reading frame 41 (C12orf41)	-2.55119
NM_013262.3	myosin regulatory light chain interacting protein (MYLIP)	-2.5462
NM_152562.2	cell division cycle associated 2 (CDCA2)	-2.53884
NM_006328.2	RNA binding motif protein 14 (RBM14)	-2.52255
NM_005800.3	ubiquitin specific peptidase like 1 (USPL1)	-2.51954
NM_002198.1	interferon regulatory factor 1 (IRF1)	-2.51807
NM_015144.1	zinc finger, CCHC domain containing 14 (ZCCHC14)	-2.497
NM_018101.2	cell division cycle associated 8 (CDCA8)	-2.48459
NM_015094.1	hypermethylated in cancer 2 (HIC2)	-2.48403
NM_003211.3	thymine-DNA glycosylase (TDG), transcript variant 1	-2.4838
NM_014686.2	KIAA0355 (KIAA0355)	-2.48222
NM_007215.2	polymerase (DNA directed), gamma 2, accessory subunit (POLG2)	-2.47847
NM_017879.1	zinc finger protein 416 (ZNF416)	-2.4732
NM_014292.3	chromobox homolog 6 (CBX6)	-2.46589
NM_001809.2	centromere protein A, 17kDa (CENPA)	-2.46372
NM_024523.5	GRIP and coiled-coil domain containing 1 (GCC1)	-2.45927
NM_052901.2	solute carrier family 25 (mitochondrial carrier; phosphate carrier), member 25 (SLC25A25), nuclear gene encoding mitochondrial protein, transcript variant 1	-2.45292
NM_015155.1	La ribonucleoprotein domain family, member 5 (LARP5)	-2.44501
NM_017769.2	KIAA1333 (KIAA1333)	-2.42749
NM_016545.3	immediate early response 5 (IER5)	-2.42424
NM_005749.2	transducer of ERBB2, 1 (TOB1)	-2.419
NM_004281.3	BCL2-associated athanogene 3 (BAG3)	-2.41301
NM_016077.3	peptidyl-tRNA hydrolase 2 (PTRH2), nuclear gene encoding mitochondrial protein, transcript variant 2	-2.41008
NM_000024.3	adrenergic, beta-2-, receptor, surface (ADRB2)	-2.40798
NM_012121.4	CDC42 effector protein (Rho GTPase binding) 4 (CDC42EP4)	-2.40373
NM_016605.1	family with sequence similarity 53, member C (FAM53C)	-2.40235
NM_203301.1	F-box protein 33 (FBXO33)	-2.40097
NM_004723.2	rho/rac guanine nucleotide exchange factor (GEF) 2 (ARHGEF2)	-2.39413
NM_024644.1	chromosome 14 open reading frame 169 (C14orf169)	-2.39238
NM_080603.3	zinc finger, SWIM-type containing 1 (ZSWIM1)	-2.3795
NM_002973.2	ataxin 2 (ATXN2)	-2.3791
NM_031424.3	chromosome 20 open reading frame 55 (C20orf55), transcript variant 1	-2.375
NM_199050.1	chromosome 21 open reading frame 25 (C21orf25)	-2.3731
NM_003194.3	TATA box binding protein (TBP)	-2.37204
NM_152269.1	hypothetical protein FLJ38663 (FLJ38663)	-2.36458
NM_032889.2	major facilitator superfamily domain containing 5 (MFSD5)	-2.36312
NM_001002860.2	BTB (POZ) domain containing 7 (BTBD7), transcript variant 1	-2.35891
NM_020368.1	disrupter of silencing 10 (SAS10)	-2.34926
NM_001969.3	eukaryotic translation initiation factor 5 (EIF5), transcript variant 1	-2.34614
NM_181708.1	hypothetical protein LOC144233 (LOC144233)	-2.3357
NM_178120.3	distal-less homeo box 1 (DLX1)	-2.32973
NM_152524.3	shugoshin-like 2 (S. pombe) (SGOL2)	-2.3252
NM_016114.3	ankyrin repeat and SOCS box-containing 1 (ASB1)	-2.32018
NM_007342.1	nucleoporin like 2 (NUPL2)	-2.31874
NM_014628.2	MAD2L1 binding protein (MAD2L1BP), transcript variant 2	-2.31445
NM_015288.4	PHD finger protein 15 (PHF15)	-2.3109
NM_152407.2	GrpE-like 2, mitochondrial (E. coli) (GRPEL2)	-2.31021
NM_005224.1	AT rich interactive domain 3A (BRIGHT- like) (ARID3A)	-2.30814
NM_001165.3	baculoviral IAP repeat-containing 3 (BIRC3), transcript variant 1	-2.30519
NM_004593.1	splicing factor, arginine/serine-rich 10 (transformer 2 homolog, Drosophila) (SFRS10)	-2.30274
NM_016258.1	YTH domain family, member 2 (YTHDF2)	-2.3006
NM_033111.2	CG016 (LOC88523)	-2.28951
NM_001005474.1	nuclear factor of kappa light polypeptide gene enhancer in B-cells inhibitor, zeta (NFKBIZ), transcript variant 2	-2.28724
NM_033089.6	zinc finger, CCHC domain containing 3 (ZCCHC3)	-2.28711
NM_020782.1	kelch domain containing 5 (KLHDC5)	-2.28014
NM_032436.1	chromosome 13 open reading frame 8 (C13orf8)	-2.27867
NM_033631.2	leucine zipper protein 1 (LUZP1)	-2.27709
NM_022767.2	interferon stimulated exonuclease gene 20kDa-like 1 (ISG20L1)	-2.27043
NM_021035.1	zinc finger, NFX1-type containing 1 (ZNFX1)	-2.26892
NM_138768.2	myeloma overexpressed gene (in a subset of t(11;14) positive multiple myelomas) (MYEOV)	-2.26376
NM_173514.1	hypothetical protein FLJ90709 (FLJ90709)	-2.26015
NM_006915.1	retinitis pigmentosa 2 (X-linked recessive) (RP2)	-2.25926
NM_015346.2	zinc finger, FYVE domain containing 26 (ZFYVE26)	-2.25513
NM_017955.2	cell division cycle associated 4 (CDCA4), transcript variant 1	-2.25276
NM_022908.1	5-nucleotidase domain containing 2 (NT5DC2)	-2.25009
NM_003131.2	serum response factor (c-fos serum response element-binding transcription factor) (SRF)	-2.25
NM_019600.1	KIAA1370 (KIAA1370)	-2.24889
NM_001511.1	chemokine (C-X-C motif) ligand 1 (melanoma growth stimulating activity, alpha) (CXCL1)	-2.24815
NM_020819.2	KIAA1411 (KIAA1411)	-2.2463
NM_033405.2	peroxisomal proliferator-activated receptor A interacting complex 285 (PRIC285), transcript variant 2	-2.24432
NM_194331.1	ring finger protein 38 (RNF38), transcript variant 4	-2.23529
NM_032991.2	caspase 3, apoptosis-related cysteine peptidase (CASP3), transcript variant beta	-2.23505
NM_006145.1	DnaJ (Hsp40) homolog, subfamily B, member 1 (DNAJB1)	-2.22967
NM_014667.1	vestigial like 4 (Drosophila) (VGLL4)	-2.22734
NM_203344.1	SERTA domain containing 3 (SERTAD3), transcript variant 2	-2.22311
NM_001024843.1	trinucleotide repeat containing 6B (TNRC6B), transcript variant 2	-2.2129
NM_078467.1	cyclin-dependent kinase inhibitor 1A (p21, Cip1) (CDKN1A), transcript variant 2	-2.20787
NM_000081.2	lysosomal trafficking regulator (LYST), transcript variant 1	-2.20733
NM_004091.2	E2F transcription factor 2 (E2F2)	-2.20183
NM_006779.2	CDC42 effector protein (Rho GTPase binding) 2 (CDC42EP2)	-2.2
NM_145647.1	WD repeat domain 67 (WDR67)	-2.19711
NM_004177.3	syntaxin 3A (STX3A)	-2.19631
NM_152678.1	hypothetical protein FLJ34969 (FLJ34969)	-2.19426
NM_016936.2	ubinuclein 1 (UBN1)	-2.19182
NM_004776.2	UDP-Gal:betaGlcNAc beta 1,4- galactosyltransferase, polypeptide 5 (B4GALT5)	-2.19018
NM_020147.2	THAP domain containing 10 (THAP10)	-2.18707
NM_018136.2	asp (abnormal spindle)-like, microcephaly associated (Drosophila) (ASPM)	-2.18484
NM_015265.1	SATB family member 2 (SATB2)	-2.18367
NM_020770.1	cingulin (CGN)	-2.18332
NM_018174.4	BPY2 interacting protein 1 (BPY2IP1)	-2.17801
NM_030935.3	TSC22 domain family, member 4 (TSC22D4)	-2.17603
NM_152624.4	DCP2 decapping enzyme homolog (S. cerevisiae) (DCP2)	-2.17161
NM_152259.2	chromosome 15 open reading frame 42 (C15orf42)	-2.16891
NM_152362.1	tumor necrosis factor, alpha-induced protein 8-like 1 (TNFAIP8L1)	-2.1682
NM_003173.1	suppressor of variegation 3-9 homolog 1 (Drosophila) (SUV39H1)	-2.16797
NM_145265.2	similar to RIKEN cDNA 0610011N22 (LOC133957)	-2.16653
NM_198467.1	round spermatid basic protein 1-like (RSBN1L)	-2.16515
NM_025182.2	KIAA1539 (KIAA1539)	-2.16194
NM_024772.2	zinc finger, MYM-type 1 (ZMYM1)	-2.16109
NM_005926.2	microfibrillar-associated protein 1 (MFAP1)	-2.15704
NM_001514.3	general transcription factor IIB (GTF2B)	-2.15648
NM_018948.2	ERBB receptor feedback inhibitor 1 (ERRFI1)	-2.15525
NM_014949.2	KIAA0907 (KIAA0907)	-2.15403
NM_032792.2	zinc finger protein 499 (ZNF499)	-2.14663
NM_007346.2	opioid growth factor receptor (OGFR)	-2.14639
NM_022340.2	zinc finger, FYVE domain containing 20 (ZFYVE20)	-2.14192
NM_014793.3	leucine carboxyl methyltransferase 2 (LCMT2)	-2.13578
NM_015049.1	trafficking protein, kinesin binding 2 (TRAK2)	-2.13534
NM_022048.2	casein kinase 1, gamma 1 (CSNK1G1), transcript variant 2	-2.13445
CD640673	AGENCOURT_14535501 NIH_MGC_191 cDNA clone IMAGE:30415823 5	-2.13438
NM_003439.1	zinc finger with KRAB and SCAN domains 1 (ZKSCAN1)	-2.13342
NM_144997.4	folliculin (FLCN), transcript variant 1	-2.13152
NM_020676.4	abhydrolase domain containing 6 (ABHD6)	-2.13043
NM_017748.3	coiled-coil domain containing 49 (CCDC49)	-2.12926
NM_033319.1	chromosome 1 open reading frame 155 (C1orf155)	-2.12861
NM_003847.1	peroxisomal biogenesis factor 11A (PEX11A)	-2.12839
NM_024039.1	MIS12 homolog (yeast) (MIS12)	-2.12507
NM_022774.1	chromosome 1 open reading frame 176 (C1orf176)	-2.12465
NM_001006610.1	seven in absentia homolog 1 (Drosophila) (SIAH1), transcript variant 2	-2.12441
NM_007358.1	metal response element binding transcription factor 2 (MTF2)	-2.1201
NM_033224.3	purine-rich element binding protein B (PURB)	-2.11874
NM_024927.3	pleckstrin homology domain containing, family H (with MyTH4 domain) member 3 (PLEKHH3)	-2.11842
NR_002569.1	mgU2-19/30 scaRNA (LOC619383) on chromosome 11.	-2.11515
NM_007271.2	serine/threonine kinase 38 (STK38)	-2.11445
NM_144684.1	zinc finger protein 480 (ZNF480)	-2.11266
NM_022826.2	membrane-associated ring finger (C3HC4) 7 (MARCH7)	-2.11168
AJ420430	mRNA full length insert cDNA clone EUROIMAGE 1674211	-2.10818
NM_017819.1	RNA (guanine-9-) methyltransferase domain containing 1 (RG9MTD1)	-2.10557
NM_014761.2	KIAA0174 (KIAA0174)	-2.1037
NM_006622.1	polo-like kinase 2 (Drosophila) (PLK2)	-2.10359
NM_032847.1	chromosome 8 open reading frame 76 (C8orf76)	-2.09927
AK126342	cDNA FLJ44370 fis, clone TRACH3008902	-2.09912
NM_032857.2	lactamase, beta (LACTB), nuclear gene encoding mitochondrial protein, transcript variant 1	-2.09499
NM_003582.2	dual-specificity tyrosine-(Y)-phosphorylation regulated kinase 3 (DYRK3), transcript variant 1	-2.09157
NM_020901.1	CTD-binding SR-like protein rA9 (KIAA1542)	-2.08921
NM_175876.3	exocyst complex component 8 (EXOC8)	-2.08782
NM_032853.2	melanoma associated antigen (mutated) 1 (MUM1)	-2.08748
NM_199181.2	chromosome 20 open reading frame 117 (C20orf117), transcript variant 2	-2.08715
NM_003887.1	development and differentiation enhancing factor 2 (DDEF2)	-2.08627
NM_021824.2	NIF3 NGG1 interacting factor 3-like 1 (S. pombe) (NIF3L1)	-2.07969
XM_939668.1	PREDICTED: deltex homolog 2 (Drosophila) (DTX2)	-2.07344
NM_018027.2	FERM domain containing 4A (FRMD4A)	-2.06835
XM_937669.1	PREDICTED: zinc finger and BTB domain containing 34 (ZBTB34)	-2.06534
NM_015558.3	synovial sarcoma translocation gene on chromosome 18-like 1 (SS18L1), transcript variant 2	-2.06318
NM_207356.1	chromosome 1 open reading frame 174 (C1orf174)	-2.0589
XM_291277.4	PREDICTED: hypothetical protein DKFZp761P0423 (DKFZp761P0423)	-2.05871
NM_003086.1	small nuclear RNA activating complex, polypeptide 4, 190kDa (SNAPC4)	-2.05814
NM_033102.1	solute carrier family 45, member 3 (SLC45A3)	-2.0523
NM_001010990.1	homocysteine-inducible, endoplasmic reticulum stress-inducible, ubiquitin-like domain member 1 (HERPUD1), transcript variant 3	-2.05217
NM_013450.1	bromodomain adjacent to zinc finger domain, 2B (BAZ2B)	-2.04959
NM_032018.4	chromosome 1 open reading frame 124 (C1orf124), transcript variant 1	-2.0491
NM_014875.1	kinesin family member 14 (KIF14)	-2.048
NM_199420.2	polymerase (DNA directed), theta (POLQ)	-2.04772
NM_005802.2	topoisomerase I binding, arginine/serine-rich (TOPORS)	-2.04599
NM_001003800.1	bicaudal D homolog 2 (Drosophila) (BICD2), transcript variant 1	-2.04516
NM_018976.3	solute carrier family 38, member 2 (SLC38A2)	-2.04419
NM_018847.1	kelch-like 9 (Drosophila) (KLHL9)	-2.04351
NM_153331.2	potassium channel tetramerisation domain containing 6 (KCTD6)	-2.03646
NM_001032386.1	sulfite oxidase (SUOX), nuclear gene encoding mitochondrial protein, transcript variant 2	-2.03595
NM_001949.2	E2F transcription factor 3 (E2F3)	-2.03563
NM_058172.3	anthrax toxin receptor 2 (ANTXR2)	-2.0347
NM_012406.3	PR domain containing 4 (PRDM4)	-2.03361
NM_016464.2	hypothetical protein HSPC196 (HSPC196)	-2.03185
NM_005515.2	homeobox HB9 (HLXB9)	-2.03085
NM_001570.3	interleukin-1 receptor-associated kinase 2 (IRAK2)	-2.03054
NM_018419.2	SRY (sex determining region Y)-box 18 (SOX18)	-2.02754
NM_017998.1	chromosome 9 open reading frame 40 (C9orf40)	-2.02687
NM_003745.1	suppressor of cytokine signaling 1 (SOCS1)	-2.02402
NM_153261.3	hypothetical protein FLJ38101 (FLJ38101)	-2.02369
NM_014319.3	LEM domain containing 3 (LEMD3)	-2.01982
NM_024613.2	pleckstrin homology domain containing, family F (with FYVE domain) member 2 (PLEKHF2)	-2.01974
NM_021784.3	forkhead box A2 (FOXA2), transcript variant 1	-2.01965
NM_024546.2	chromosome 13 open reading frame 7 (C13orf7)	-2.01891
NM_031492.2	RNA binding motif protein 4B (RBM4B)	-2.01889
NM_015062.3	peroxisome proliferative activated receptor, gamma, coactivator-related 1 (PPRC1)	-2.01872
NM_002250.2	potassium intermediate/small conductance calcium-activated channel, subfamily N, member 4 (KCNN4)	-2.01429
NM_012384.2	glucocorticoid modulatory element binding protein 2 (GMEB2)	-2.01277
NM_001033521.1	cleavage stimulation factor, 3 pre-RNA, subunit 1, 50kDa (CSTF1), transcript variant 1	-2.01181
NM_000368.3	tuberous sclerosis 1 (TSC1), transcript variant 1	-2.00871
NM_152608.2	chromosome 1 open reading frame 55 (C1orf55)	-2.0087
NM_014711.3	CP110 protein (CP110)	-2.00861
NM_032444.2	BTB (POZ) domain containing 12 (BTBD12)	-2.00779
NM_006963.3	zinc finger protein 22 (KOX 15) (ZNF22)	-2.00628
NM_005189.1	chromobox homolog 2 (Pc class homolog, Drosophila) (CBX2), transcript variant 1	-2.00536
NM_016261.2	tubulin, delta 1 (TUBD1)	-2.00244
NM_198566.1	FLJ32363 protein (FLJ32363)	-2.00143
Induced genes
NM_006186.2	nuclear receptor subfamily 4, group A, member 2 (NR4A2), transcript variant 1	7.07534
AK123449	cDNA FLJ41455 fis, clone BRSTN2012284	6.315
NM_006931.1	solute carrier family 2 (facilitated glucose transporter), member 3 (SLC2A3)	5.23239
NM_021732.1	arginine vasopressin-induced 1 (AVPI1)	4.62219
NM_153449.2	solute carrier family 2 (facilitated glucose transporter), member 14 (SLC2A14)	3.6517
NM_013409.1	follistatin (FST), transcript variant FST344	3.34753
NM_001030287.1	activating transcription factor 3 (ATF3), transcript variant 3	3.2704
NM_019058.2	DNA-damage-inducible transcript 4 (DDIT4)	3.23445
NM_139314.1	angiopoietin-like 4 (ANGPTL4), transcript variant 1	3.18841
NM_002923.1	regulator of G-protein signalling 2, 24kDa (RGS2)	3.0188
NM_001033506.1	cleavage stimulation factor, 3 pre-RNA, subunit 3, 77kDa (CSTF3), transcript variant 3	2.97317
NM_018555.4	zinc finger protein 331 (ZNF331)	2.85731
NM_003220.1	transcription factor AP-2 alpha (activating enhancer binding protein 2 alpha) (TFAP2A), transcript variant 1	2.80723
NM_005384.2	nuclear factor, interleukin 3 regulated (NFIL3)	2.77126
XM_372780.3	PREDICTED: similar to Solute carrier family 2, facilitated glucose transporter member 3 (Glucose transporter type 3, brain) (LOC391045)	2.68589
NM_013961.1	neuregulin 1 (NRG1), transcript variant GGF	2.62321
NM_012461.1	TERF1 (TRF1)-interacting nuclear factor 2 (TINF2)	2.60017
NM_003155.2	stanniocalcin 1 (STC1)	2.42198
NM_012242.2	dickkopf homolog 1 (Xenopus laevis) (DKK1)	2.41585
NM_006350.2	follistatin (FST), transcript variant FST317	2.37679
NM_001013398.1	insulin-like growth factor binding protein 3 (IGFBP3), transcript variant 1	2.37451
NM_024796.1	hypothetical protein FLJ22639 (FLJ22639)	2.36905
NM_199423.1	WW domain containing E3 ubiquitin protein ligase 2 (WWP2), transcript variant 3	2.36225
NM_005738.2	ADP-ribosylation factor-like 4 (ARL4), transcript variant 1	2.33267
NM_004591.1	chemokine (C-C motif) ligand 20 (CCL20)	2.30476
NM_020412.3	chromatin modifying protein 1B (CHMP1B)	2.28939
NM_003528.2	histone 2, H2be (HIST2H2BE)	2.2329
NM_003463.3	protein tyrosine phosphatase type IVA, member 1 (PTP4A1)	2.13225
XM_927836.1	PREDICTED: hypothetical LOC493754 (LOC493754)	2.0965
NM_033663.2	dopamine receptor D3 (DRD3), transcript variant e	2.0846
NM_000189.4	hexokinase 2 (HK2)	2.08042
NM_004071.2	CDC-like kinase 1 (CLK1), transcript variant 1	2.08041
NM_173344.1	ST3 beta-galactoside alpha-2,3-sialyltransferase 1 (ST3GAL1), transcript variant 2	2.02904
NM_001006622.1	WD repeat domain 33 (WDR33), transcript variant 2	2.01136
B. Genes affected in hBMEC > 2 fold by infection with DpXO1 mutant
Downregulated genes
Gene Accession number	Description	Fold change
NM_020119.3	zinc finger CCCH-type, antiviral 1 (ZC3HAV1), transcript variant 1	-9.43052
BU536065	AGENCOURT_10229596 NIH_MGC_141 cDNA clone IMAGE:6563923 5	-6.20338
NM_003234.1	transferrin receptor (p90, CD71) (TFRC)	-4.16054
NM_001969.3	eukaryotic translation initiation factor 5 (EIF5), transcript variant 1	-3.89685
NM_182661.1	ceramide kinase (CERK), transcript variant 2	-3.04818
NM_001761.1	cyclin F (CCNF)	-2.65421
NM_005911.4	methionine adenosyltransferase II, alpha (MAT2A)	-2.64281
NM_015885.2	PCF11, cleavage and polyadenylation factor subunit, homolog (S. cerevisiae) (PCF11)	-2.61316
NM_019606.4	bin3, bicoid-interacting 3, homolog (Drosophila) (BCDIN3)	-2.59376
XM_938904.1	PREDICTED: BTG3 associated nuclear protein (BANP)	-2.49387
NM_199169.1	transmembrane, prostate androgen induced RNA (TMEPAI), transcript variant 2	-2.48486
NM_001002860.2	BTB (POZ) domain containing 7 (BTBD7), transcript variant 1	-2.44899
NM_020967.2	nuclear receptor coactivator 5 (NCOA5)	-2.41079
NM_030645.1	SH3-binding domain protein 5-like (SH3BP5L)	-2.36807
NM_079837.1	BTG3 associated nuclear protein (BANP), transcript variant 2	-2.32113
BC036485	cDNA clone IMAGE:5261213	-2.29955
NM_152240.1	p53 target zinc finger protein (WIG1), transcript variant 2	-2.28952
AK094914	cDNA FLJ37595 fis, clone BRCOC2007864	-2.27908
NM_021826.4	hypothetical protein FLJ13149 (FLJ13149)	-2.24706
NM_199050.1	chromosome 21 open reading frame 25 (C21orf25)	-2.24641
NM_024924.3	zinc finger protein 702 (ZNF702)	-2.24298
NM_024747.4	Hermansky-Pudlak syndrome 6 (HPS6)	-2.23895
NM_006831.1	ATP/GTP-binding protein (HEAB)	-2.23484
NM_017810.2	zinc finger protein 434 (ZNF434)	-2.23147
NM_145014.1	hydrolethalus syndrome 1 (HYLS1)	-2.21278
NM_004627.2	tryptophan rich basic protein (WRB)	-2.20677
NM_020151.2	START domain containing 7 (STARD7), transcript variant 1	-2.10616
NM_001280.1	cold inducible RNA binding protein (CIRBP)	-2.097
NM_022106.1	chromosome 20 open reading frame 177 (C20orf177)	-2.08189
NM_018169.2	chromosome 12 open reading frame 35 (C12orf35)	-2.07546
NM_032042.3	chromosome 5 open reading frame 21 (C5orf21)	-2.06392
NM_198088.1	zinc finger protein 200 (ZNF200), transcript variant 3	-2.0614
NM_015049.1	trafficking protein, kinesin binding 2 (TRAK2)	-2.05279
NM_015288.4	PHD finger protein 15 (PHF15)	-2.0458
NM_018348.4	hypothetical protein FLJ11171 (FLJ11171)	-2.02788
NM_016324.2	zinc finger protein 274 (ZNF274), transcript variant ZNF274b	-2.02347
NM_000891.2	potassium inwardly-rectifying channel, subfamily J, member 2 (KCNJ2)	-2.02191
NM_006328.2	RNA binding motif protein 14 (RBM14)	-2.00031
Induced genes
NM_019058.2	DNA-damage-inducible transcript 4 (DDIT4)	13.6093
NM_006931.1	solute carrier family 2 (facilitated glucose transporter), member 3 (SLC2A3)	13.3435
NM_181726.1	ankyrin repeat domain 37 (ANKRD37)	11.4847
NM_006186.2	nuclear receptor subfamily 4, group A, member 2 (NR4A2), transcript variant 1	10.5791
NM_139314.1	angiopoietin-like 4 (ANGPTL4), transcript variant 1	10.3679
NM_005252.2	v-fos FBJ murine osteosarcoma viral oncogene homolog (FOS)	7.93956
NM_001124.1	adrenomedullin (ADM)	5.73017
NM_000189.4	hexokinase 2 (HK2)	5.66967
NM_003407.1	zinc finger protein 36, C3H type, homolog (mouse) (ZFP36)	5.19523
NM_004417.2	dual specificity phosphatase 1 (DUSP1)	4.55697
NM_001964.2	early growth response 1 (EGR1)	4.54124
NM_013332.1	hypoxia-inducible protein 2 (HIG2)	4.02696
NM_015675.1	growth arrest and DNA-damage-inducible, beta (GADD45B)	3.99061
NM_000600.1	interleukin 6 (interferon, beta 2) (IL6)	3.86361
NM_012118.2	CCR4 carbon catabolite repression 4-like (S. cerevisiae) (CCRN4L)	3.74182
NM_003528.2	histone 2, H2be (HIST2H2BE)	3.57153
NM_020801.1	arrestin domain containing 3 (ARRDC3)	3.53749
NM_004071.2	CDC-like kinase 1 (CLK1), transcript variant 1	3.47545
NM_002923.1	regulator of G-protein signalling 2, 24kDa (RGS2)	3.40271
NM_052815.1	immediate early response 3 (IER3), transcript variant long	3.37779
NM_001024646.1	CDC-like kinase 1 (CLK1), transcript variant 2	3.32449
NM_005398.3	protein phosphatase 1, regulatory (inhibitor) subunit 3C (PPP1R3C)	3.31605
NM_153449.2	solute carrier family 2 (facilitated glucose transporter), member 14 (SLC2A14)	3.20958
NM_001122.2	adipose differentiation-related protein (ADFP)	3.19293
NM_173354.2	SNF1-like kinase (SNF1LK)	3.16543
NM_003670.1	basic helix-loop-helix domain containing, class B, 2 (BHLHB2)	3.13614
NM_033027.2	AXIN1 up-regulated 1 (AXUD1)	3.09039
NM_000584.2	interleukin 8 (IL8)	3.08154
NM_001008490.1	Kruppel-like factor 6 (KLF6), transcript variant 1	2.97628
NM_004864.1	growth differentiation factor 15 (GDF15)	2.95703
NM_006079.3	Cbp/p300-interacting transactivator, with Glu/Asp-rich carboxy-terminal domain, 2 (CITED2)	2.93172
XM_372780.3	PREDICTED: similar to Solute carrier family 2, facilitated glucose transporter member 3 (Glucose transporter type 3, brain) (LOC391045)	2.9302
NM_004566.2	6-phosphofructo-2-kinase/fructose-2,6-biphosphatase 3 (PFKFB3)	2.92637
NM_017817.1	RAB20, member RAS oncogene family (RAB20)	2.8831
NM_004567.2	6-phosphofructo-2-kinase/fructose-2,6-biphosphatase 4 (PFKFB4)	2.87665
NM_005384.2	nuclear factor, interleukin 3 regulated (NFIL3)	2.84012
NM_001013398.1	insulin-like growth factor binding protein 3 (IGFBP3), transcript variant 1	2.82088
NM_006732.1	FBJ murine osteosarcoma viral oncogene homolog B (FOSB)	2.77565
NM_003155.2	stanniocalcin 1 (STC1)	2.74585
NM_002133.1	heme oxygenase (decycling) 1 (HMOX1)	2.74085
NM_001993.2	coagulation factor III (thromboplastin, tissue factor) (F3)	2.72805
NM_004591.1	chemokine (C-C motif) ligand 20 (CCL20)	2.67419
NM_014330.2	protein phosphatase 1, regulatory (inhibitor) subunit 15A (PPP1R15A)	2.64225
NM_003714.2	stanniocalcin 2 (STC2)	2.64108
NM_001300.4	Kruppel-like factor 6 (KLF6), transcript variant 2	2.63159
NM_000602.1	serpin peptidase inhibitor, clade E (nexin, plasminogen activator inhibitor type 1), member 1 (SERPINE1)	2.62585
NM_001975.2	enolase 2 (gamma, neuronal) (ENO2)	2.62261
NM_001030287.1	activating transcription factor 3 (ATF3), transcript variant 3	2.61925
NM_002166.4	inhibitor of DNA binding 2, dominant negative helix-loop-helix protein (ID2)	2.56766
NM_004428.2	ephrin-A1 (EFNA1), transcript variant 1	2.53678
NM_003516.2	histone 2, H2aa (HIST2H2AA)	2.52971
NM_032551.3	KISS1 receptor (KISS1R)	2.51169
NM_014755.1	SERTA domain containing 2 (SERTAD2)	2.49264
NM_173584.2	hypothetical protein MGC45840 (MGC45840)	2.46435
NM_013961.1	neuregulin 1 (NRG1), transcript variant GGF	2.39697
NM_001955.2	endothelin 1 (EDN1)	2.38634
NM_203434.1	immediate early response 5-like (IER5L)	2.33708
NM_024796.1	hypothetical protein FLJ22639 (FLJ22639)	2.3254
NM_002648.2	pim-1 oncogene (PIM1)	2.32372
NM_078626.1	cyclin-dependent kinase inhibitor 2C (p18, inhibits CDK4) (CDKN2C), transcript variant 2	2.32224
NM_005985.2	snail homolog 1 (Drosophila) (SNAI1)	2.31888
NM_004083.4	DNA-damage-inducible transcript 3 (DDIT3)	2.27258
BC067908	cDNA clone IMAGE:30332316	2.26857
NM_005524.2	hairy and enhancer of split 1, (Drosophila) (HES1)	2.25901
NM_003517.2	histone 2, H2ac (HIST2H2AC)	2.25812
NM_005194.2	CCAAT/enhancer binding protein (C/EBP), beta (CEBPB)	2.22247
NM_002020.1	fms-related tyrosine kinase 4 (FLT4), transcript variant 2	2.21218
NM_173344.1	ST3 beta-galactoside alpha-2,3-sialyltransferase 1 (ST3GAL1), transcript variant 2	2.17763
NM_001731.1	B-cell translocation gene 1, anti-proliferative (BTG1)	2.16517
NM_004419.3	dual specificity phosphatase 5 (DUSP5)	2.16294
NM_015508.2	TCDD-inducible poly(ADP-ribose) polymerase (TIPARP)	2.15198
NM_016133.2	insulin induced gene 2 (INSIG2)	2.14542
NM_005450.2	noggin (NOG)	2.14078
NM_003979.3	G protein-coupled receptor, family C, group 5, member A (GPRC5A)	2.10679
DB382237	DB382237 THYRO1 cDNA clone THYRO1001083 3	2.09141
XM_928387.1	PREDICTED: similar to Histone H2A.o (H2A/o) (H2A.2) (H2a-615) (LOC653610)	2.06324
NM_004064.2	cyclin-dependent kinase inhibitor 1B (p27, Kip1) (CDKN1B)	2.06195
NM_021170.2	hairy and enhancer of split 4 (Drosophila) (HES4)	2.04938
NM_020639.2	receptor-interacting serine-threonine kinase 4 (RIPK4)	2.04462
NM_002064.1	glutaredoxin (thioltransferase) (GLRX)	2.0362
NM_021732.1	arginine vasopressin-induced 1 (AVPI1)	2.03284
NM_022051.1	egl nine homolog 1 (C. elegans) (EGLN1)	2.01938
NM_003992.1	CDC-like kinase 3 (CLK3), transcript variant phclk3	2.01016
